# Supplementary material
Source: HighWire-hosted journal article supplement (http://molpharm.aspetjournals.org/highwire/filestream/76335/field_highwire_adjunct_files/0/10.1124_mol.104.005496_SUPP_TABLE_1.pdf)
Supplement: 10.1124_mol.104.005496_SUPP_TABLE_1.pdf [file 10.1124_mol.104.005496_SUPP_TABLE_1.pdf]

## SUPPLEMENTAL TABLE 1

### List of gene primers used in TaqMan studies

Anderson SP, Dunn C, Laughter A, Yoon L, Swanson C, Stulnig TM, Steffensen KR, Chandraratna RAS, Gustafsson J-A, and Corton JC (2004)  
*Mol Pharmacol* doi:10.1124/mol.104.005496.

| Gene    | Forward                  | Probe                    | Reverse                 |
|---------|--------------------------|--------------------------|-------------------------|
| Acox1   | AATTGGCACCTACGCCAG       | ATGAGTTCCGTGGCCCATCTCCG  | AGTGGTTTCCAAGCCTCGAA    |
| Ccna2   | GAAGAGGCAACCAGACACTAA    | AGCATGAGGGCGATC          | CTCAACCAGCCAGTCCACAA    |
| Ccnb1   | TCGGTTCATGCAGAACAGTTG    | TGCCCAAGAAGATG           | CCGTTACACCGACCAGCTGTA   |
| Cdc20   | TGGAGGTGACCGCTTTATCC     | CGCAGTGCTTCTC            | GAAGCTGGCCACCTCCATT     |
| Cdc2a   | GGACGAGAACGGCTTGGAT      | TGCTCTCAAAAATGCT         | ATTCGTTTGGCAGGATCATAGAC |
| Cdkn1a  | TGTCCGCACAGGAGCAA        | TGTGCCGTTGTCTCTCGGTCCC   | CGCAACTGCTCACTGTCCA     |
| Cyp4a14 | CCACCCTGAGCACCAACAG      | TGCAGAGAGGAGGTGC         | AGGTCCATCACCCAGAATGC    |
| Cyp51   | TCCTGACCGCTACTTACAGGATAA | CCAGCATCAGGAGAGAAGTTTGCC | CCAGCTCCAAATGGCACAT     |
| Fdft1   | AGAAGAAGATCCCACTGCTGTGT  | ACTTCCACACTTTCC          | ACCGCCACTCTGGGTCATAG    |
| Fdps    | GCTGGCTGGTGGTTCAGTGT     | TGCTACGAGCCTCTC          | CTCTAAGATCTGGCGCTGTTGA  |
| Idi1    | CGGGCTCGCTGTTCTATGA      | CAGGGCTTATTTAGAGGTG      | CAGCCCTACTCCTTCCCCTT    |
| Lpl     | TGAGAAATGGCAAGCAACACAA   | CAGGCCTTCGAAATT          | GGCCACTGTGCCGTACAGA     |
| Mad211  | GCGTGGGAGCGCAGAA         | TCGTGGCCGAGTTT           | TGCTGTTGATGCCAAATGAGA   |
